# Supplementary material
Source: PubMed Central journal article supplement (PMC8576538)

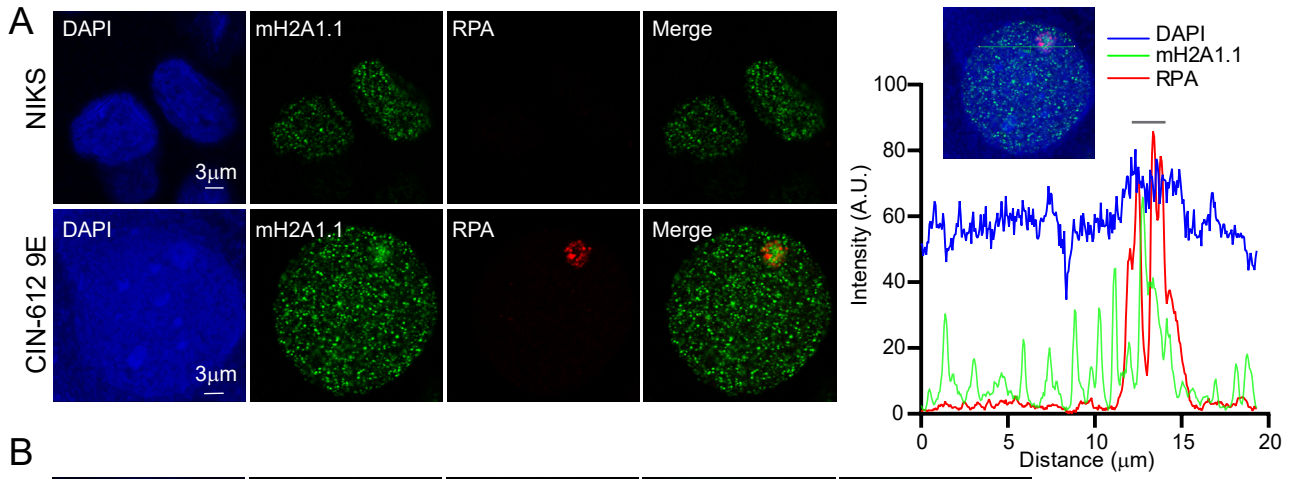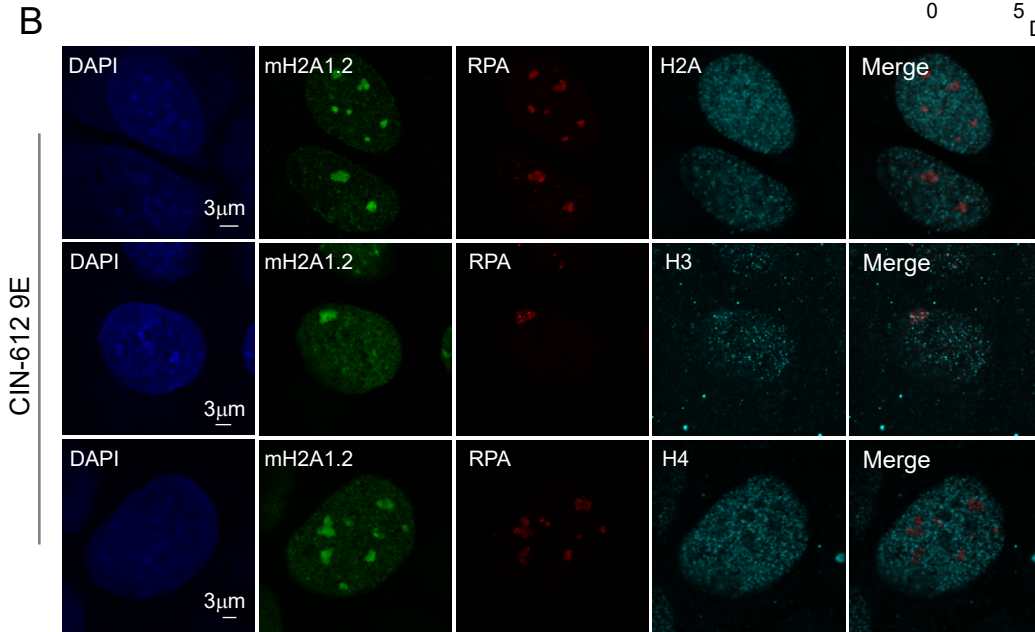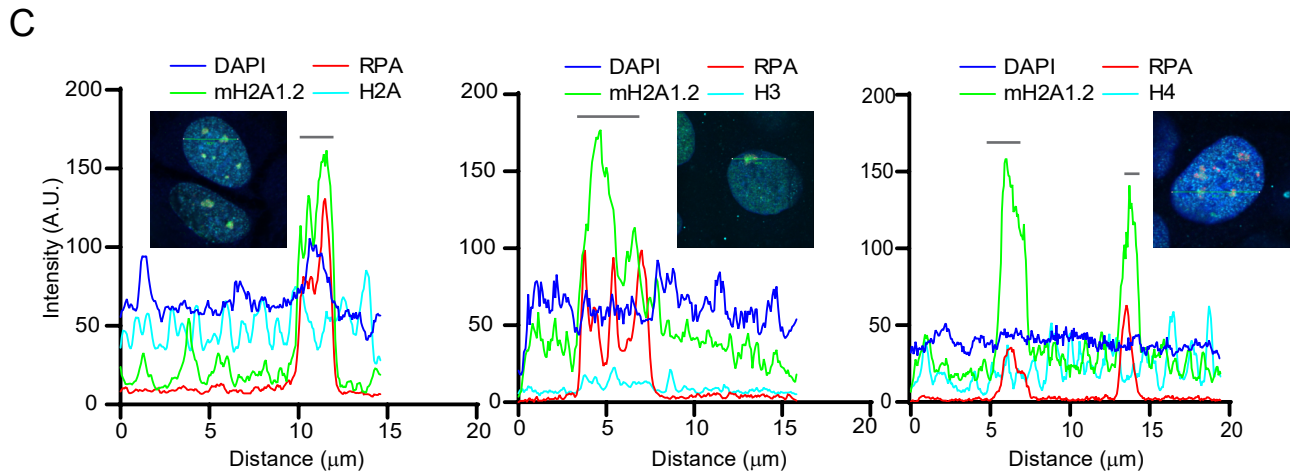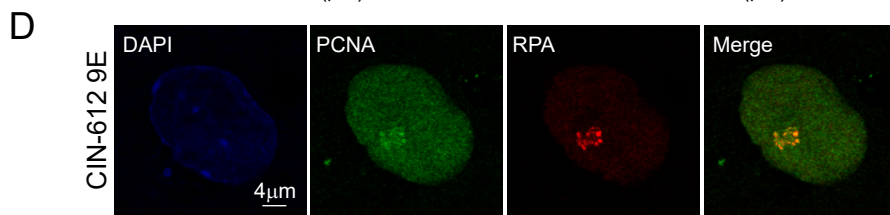

Supplement: mbio.02684-21-sf001.pdf [file mbio.02684-21-sf001.pdf]

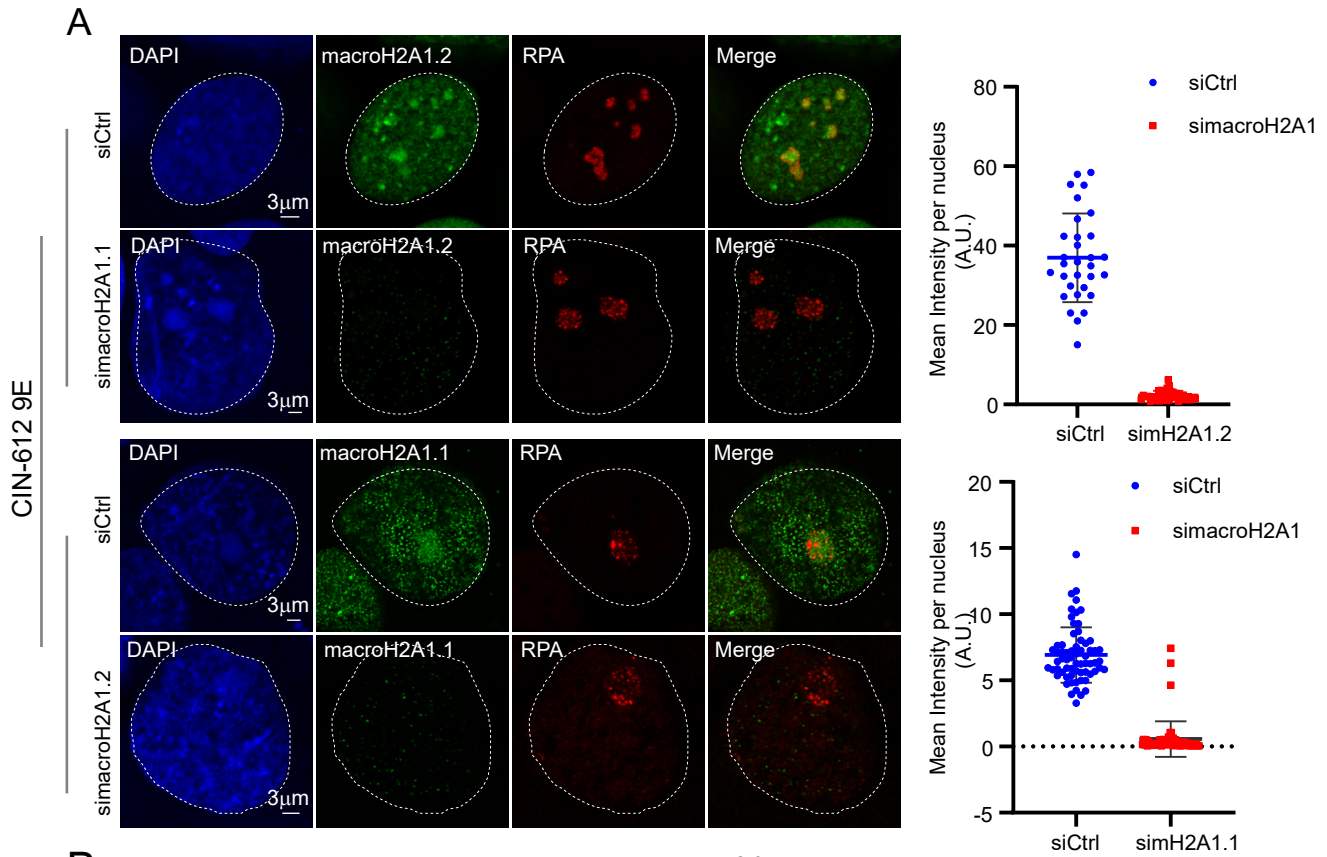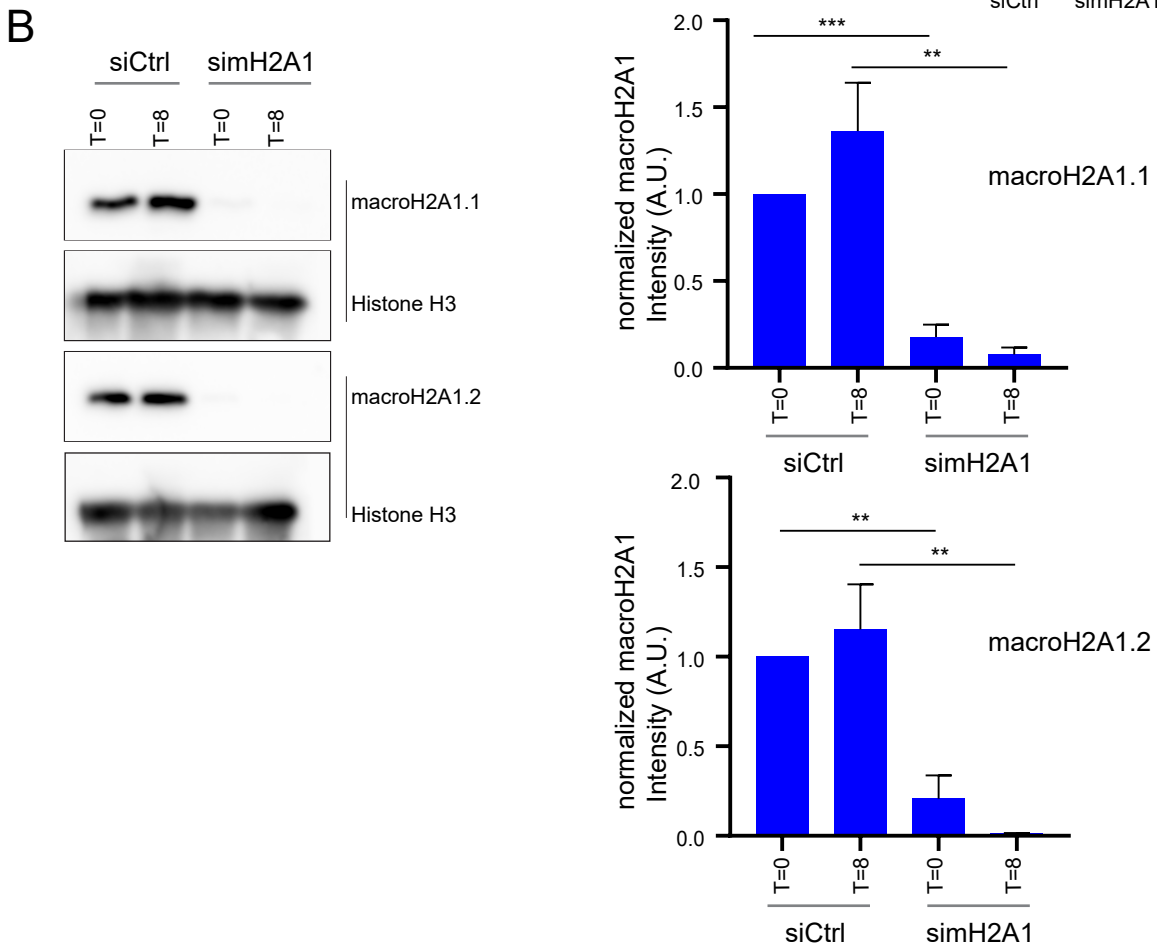

Supplement: mbio.02684-21-sf002.pdf [file mbio.02684-21-sf002.pdf]

CIN-612 9E

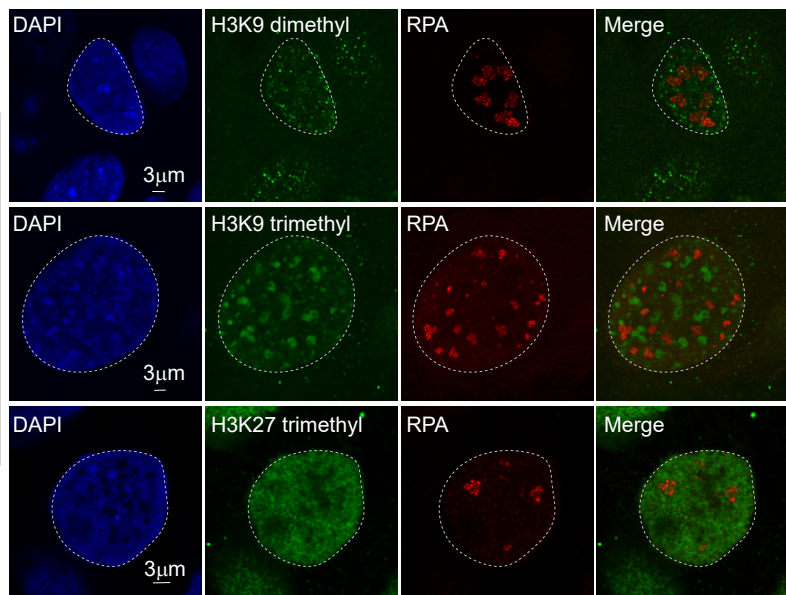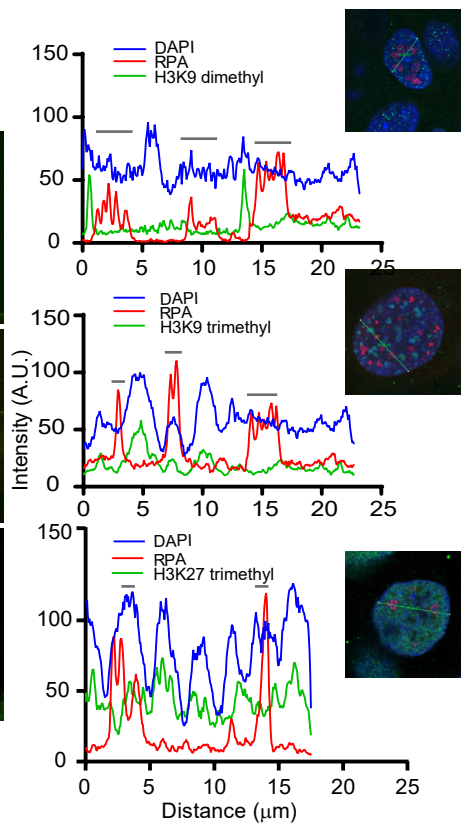

Supplement: mbio.02684-21-sf003.pdf [file mbio.02684-21-sf003.pdf]

HPV16  $\Delta$ E8^E2

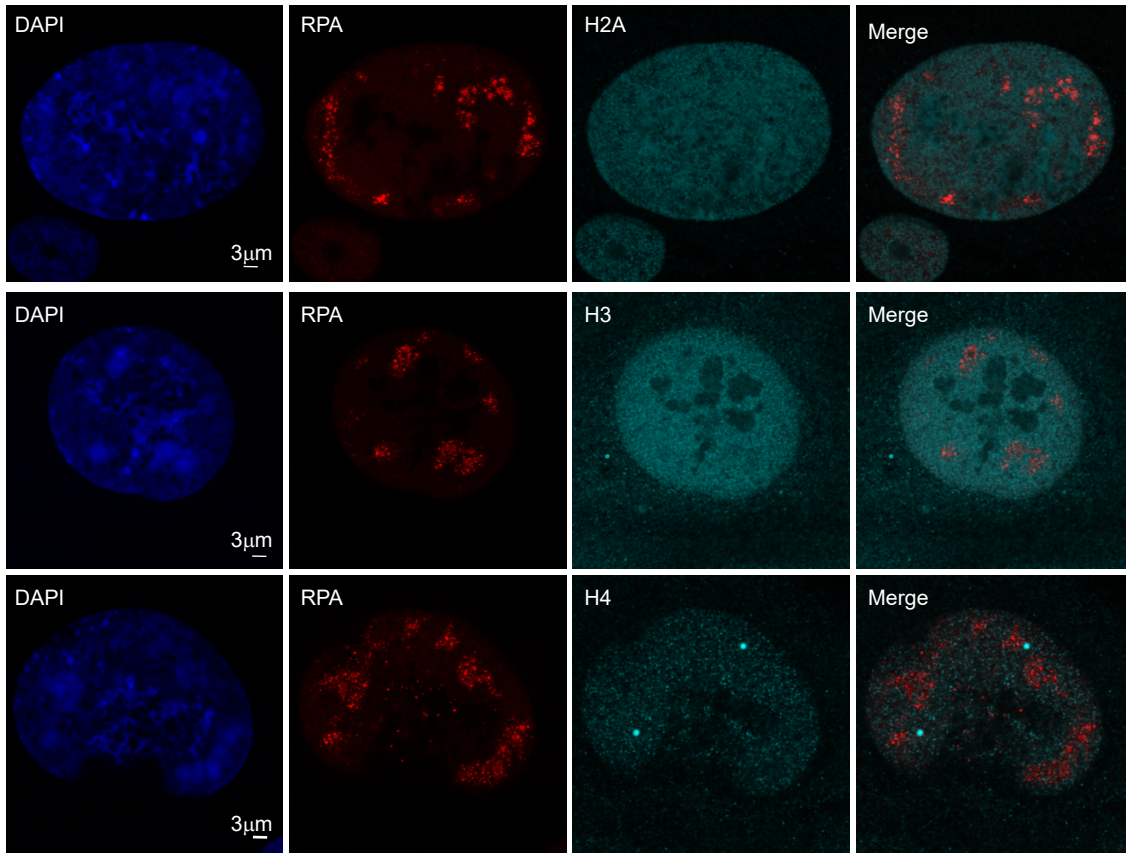

Supplement: mbio.02684-21-sf004.pdf [file mbio.02684-21-sf004.pdf]

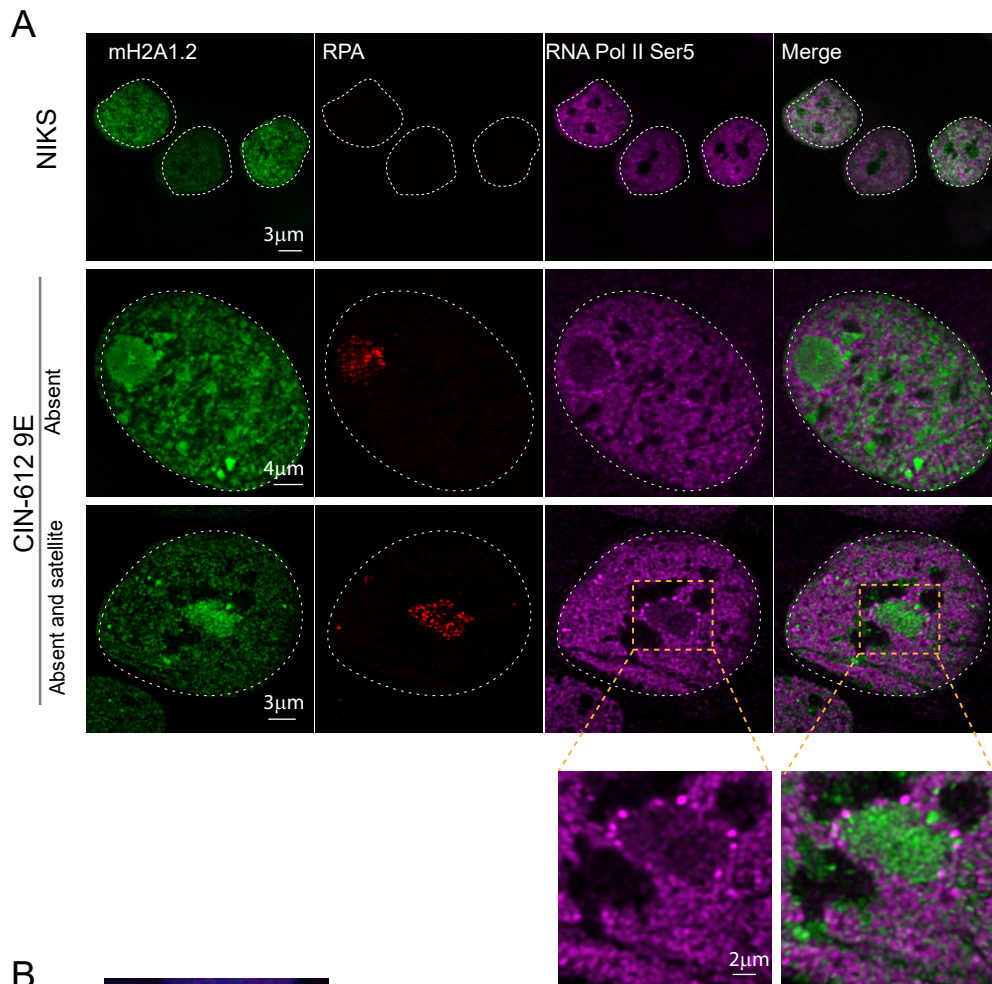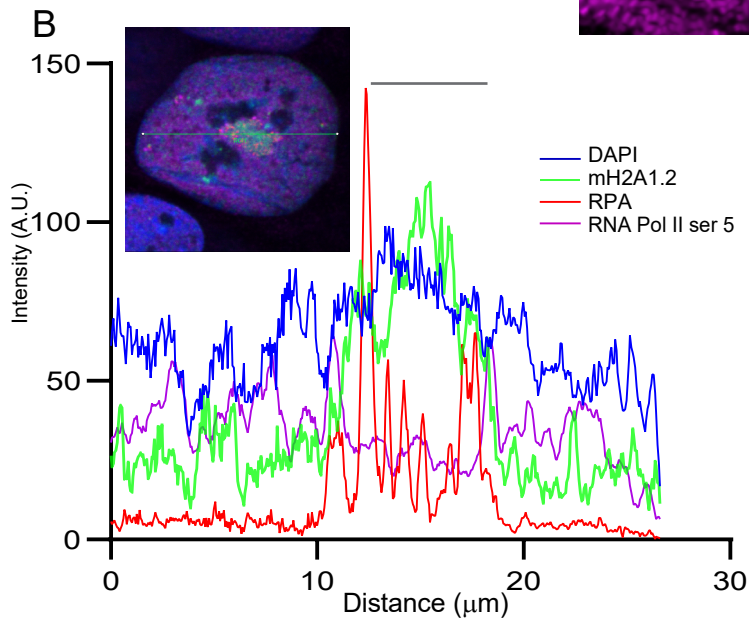

**C**

- no exclusion
- reduced or absent + satellite pattern
- reduced or absent

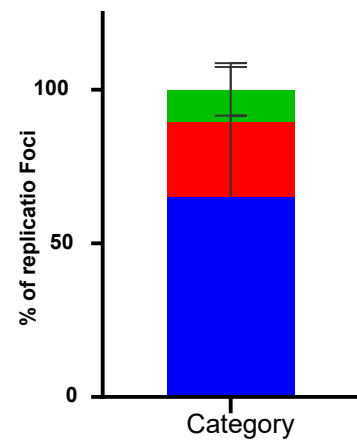

Supplement: mbio.02684-21-sf005.pdf [file mbio.02684-21-sf005.pdf]

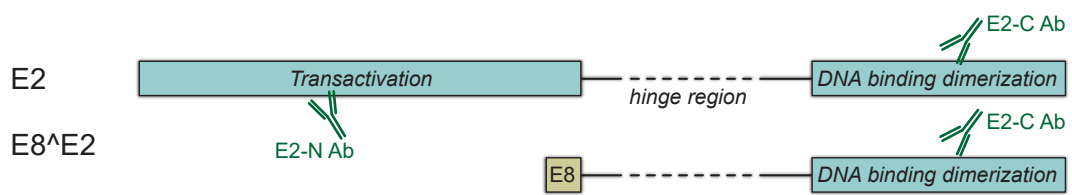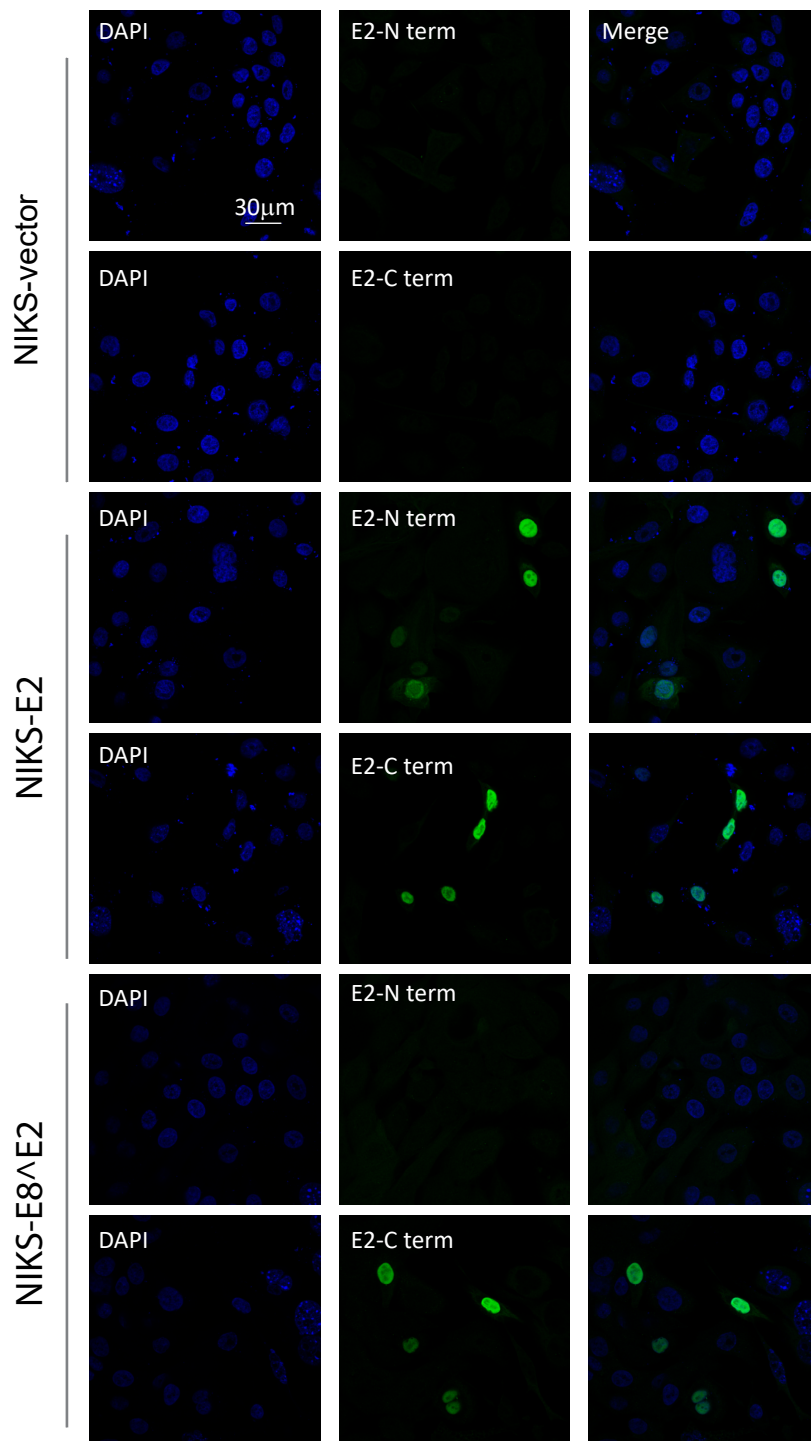

Supplement: mbio.02684-21-sf006.pdf [file mbio.02684-21-sf006.pdf]
